# Supplementary material for: Transcriptome and Metabolome Analyses of Thitarodes xiaojinensis in Response to Ophiocordyceps sinensis Infection
Source: MDPI journal article supplement (doi:10.3390/microorganisms11092361), 2023-09-21
Supplement: s1 [file s1]

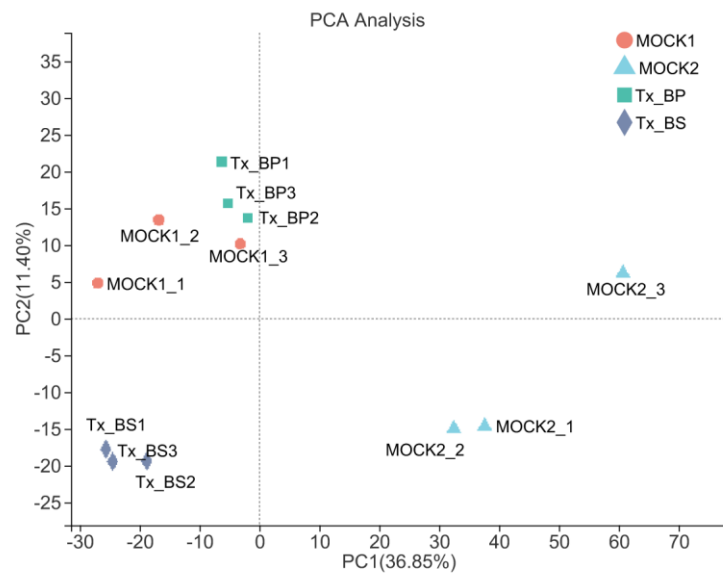

**Figure S1:** Principal component analysis of the RNA-Sequencing data.

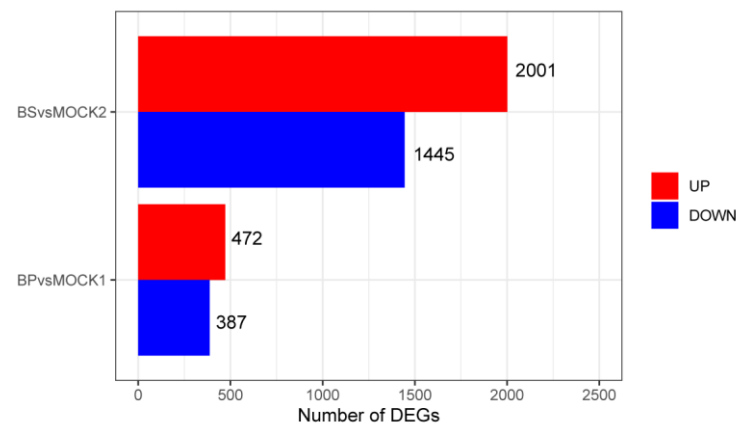

**Figure S2:** DEGs distribution between two groups analyzed. The number of DEGs is indicated on the right of the histograms.

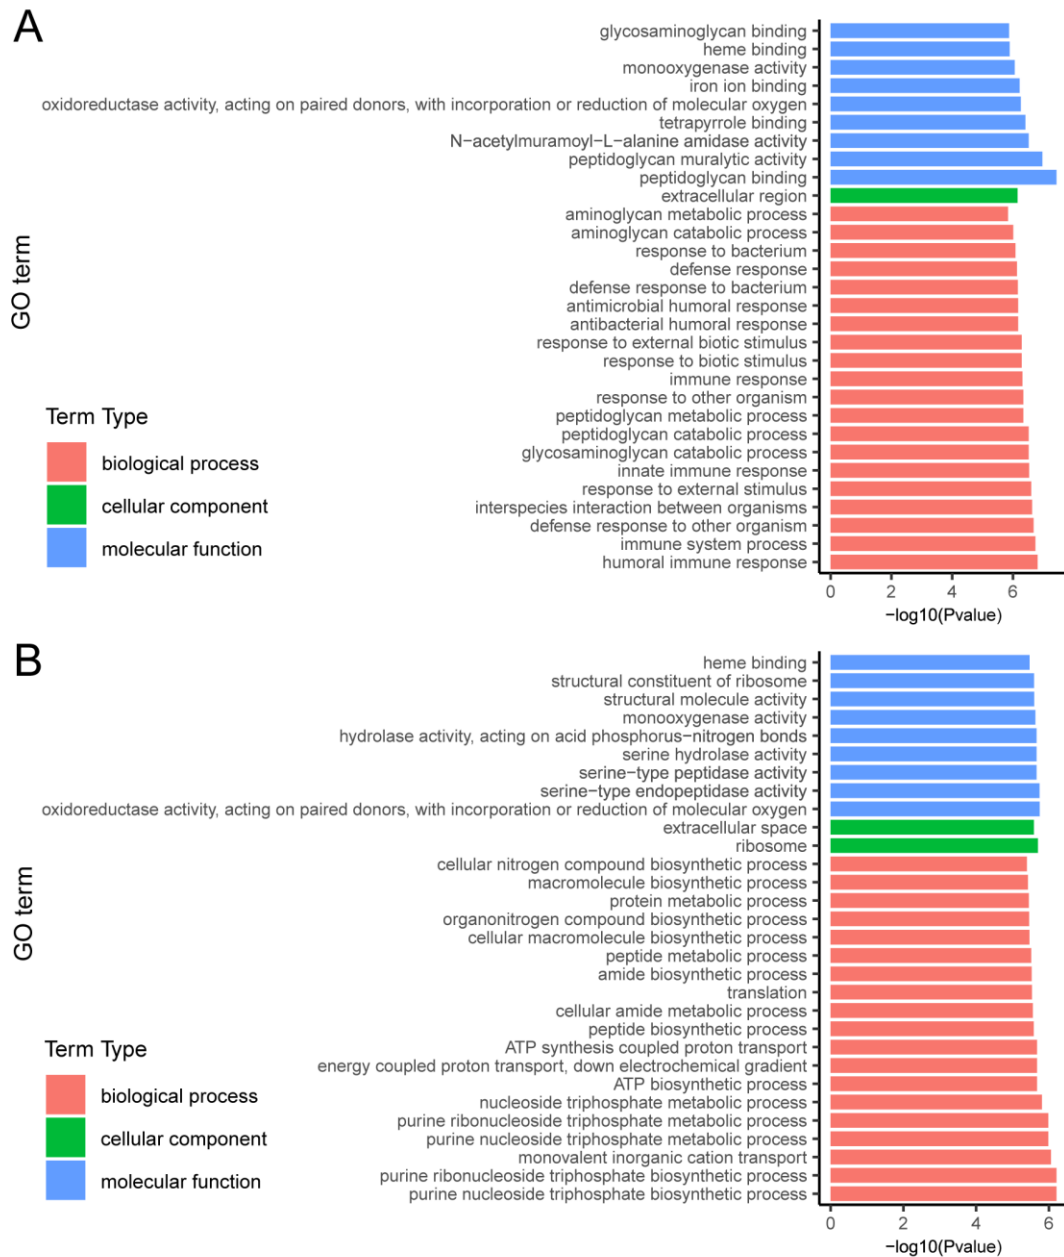

**Figure S3:** GO functional classification of differentially expressed genes. The blue bars represent molecular function; green bars represent cellular component; red bars represent biological process functions.

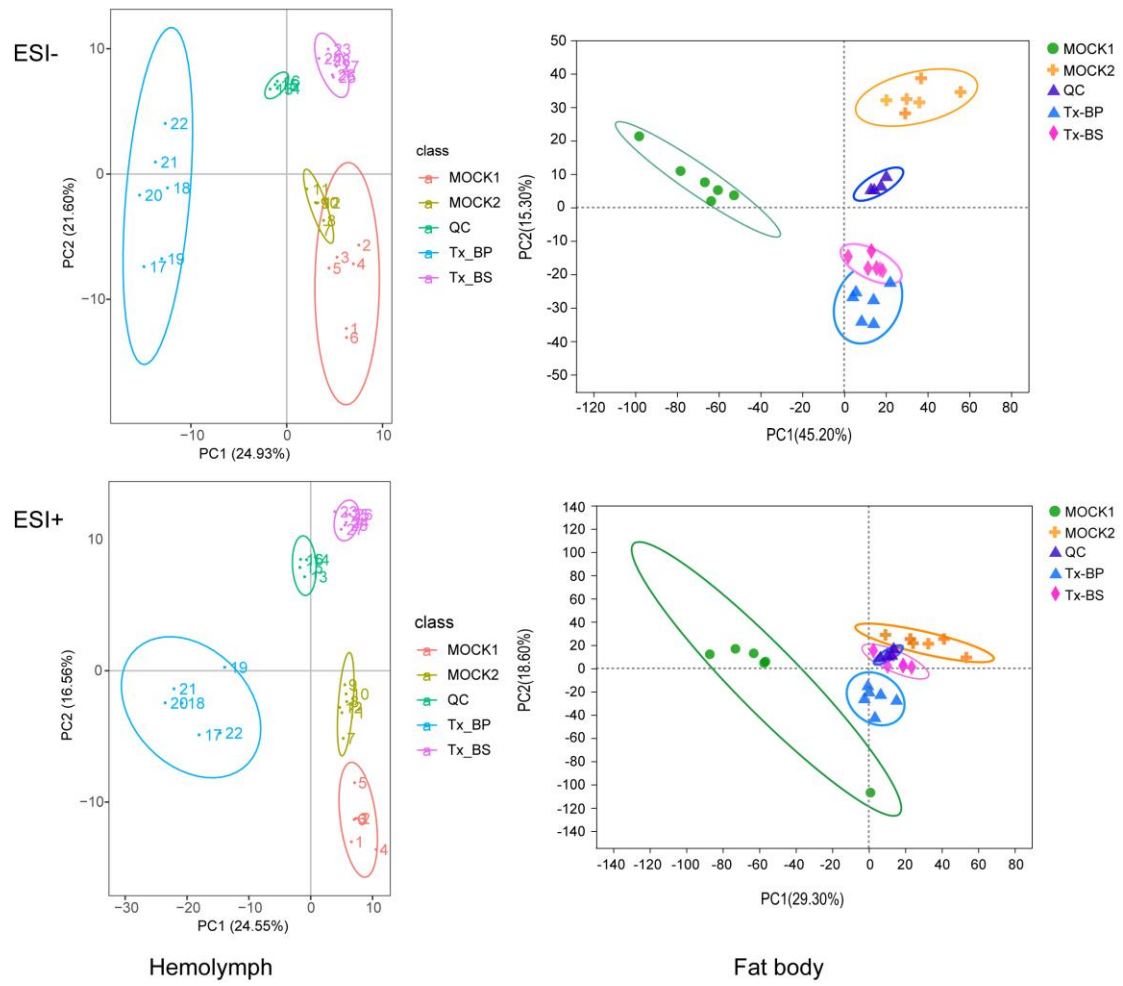

**Figure S4:** PCA plot of the different sample groups (MOCK1, MOCK2, Tx-BP, Tx-BS) and quality control. Each point represents a biological replicate.

## Hemolymph

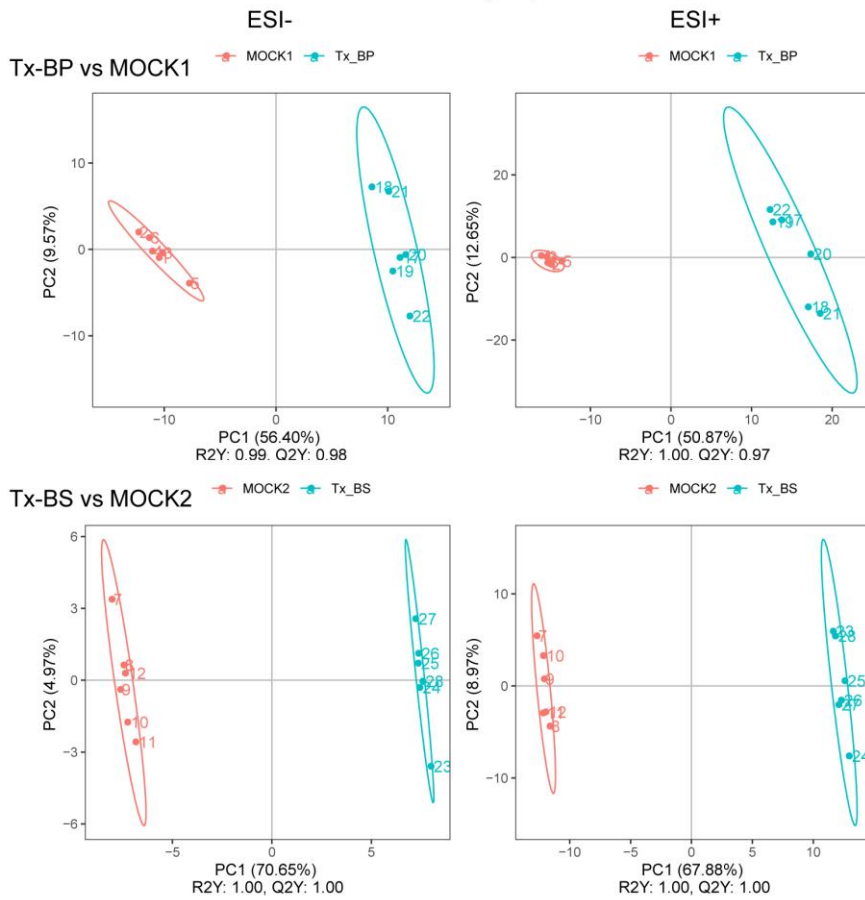

## Fat body

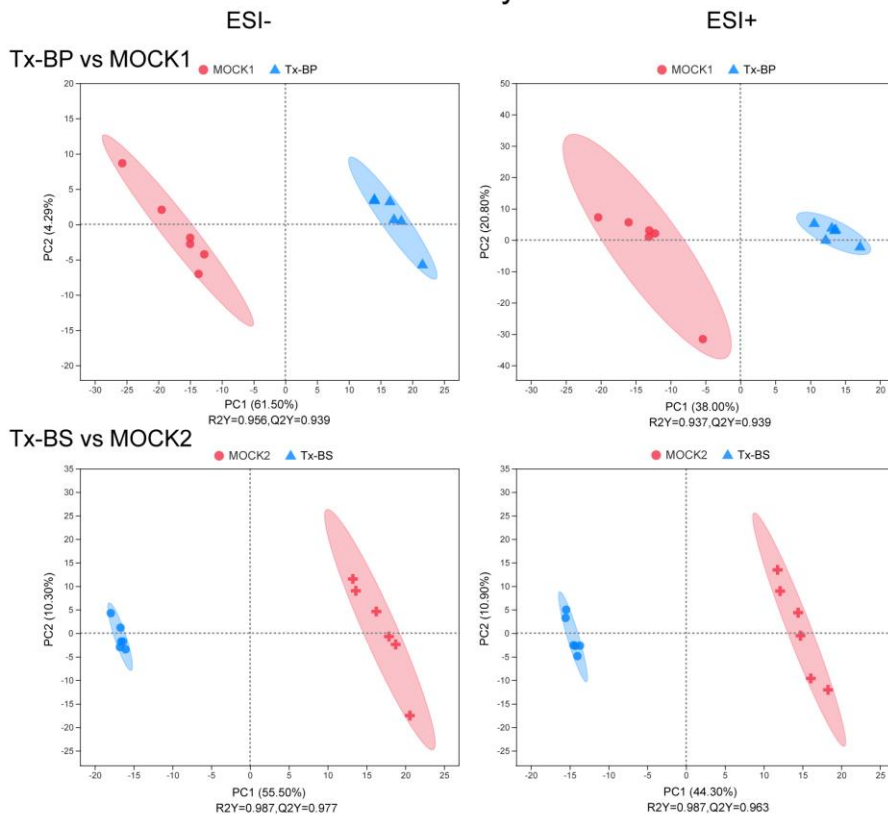

**Figure S5:** PLS-DA score plot and validation plots for the metabolic profiling results. The criteria for stability and credibility are as follows:  $R^2Y$  greater than  $Q^2Y$  values in score plots.

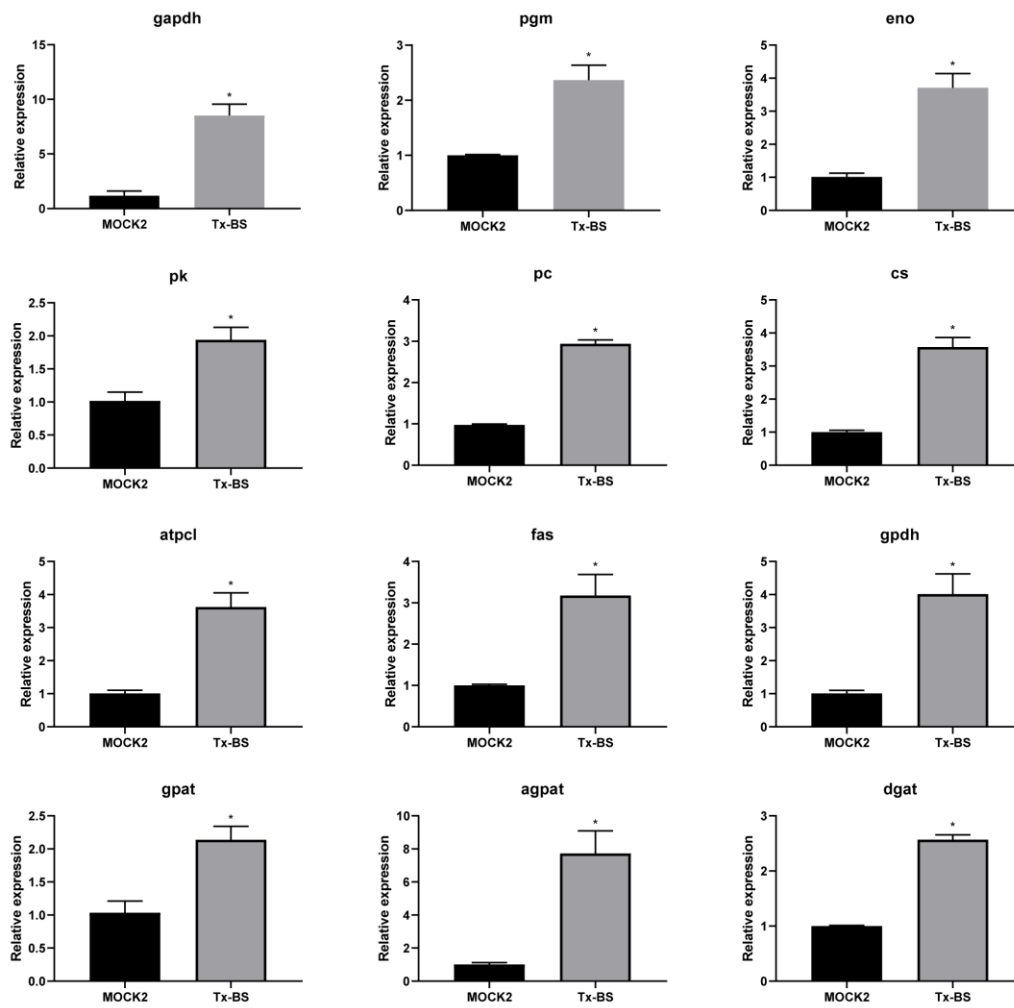

**Figure S6:** qRT-PCR validation of the RNA-Seq data. The ribosomal protein S3 (rpS3) used as a reference gene. The bars represent means  $\pm$  SEM from three independent measurements, while letters on the bars indicate significance levels based on  $p < 0.05$ .

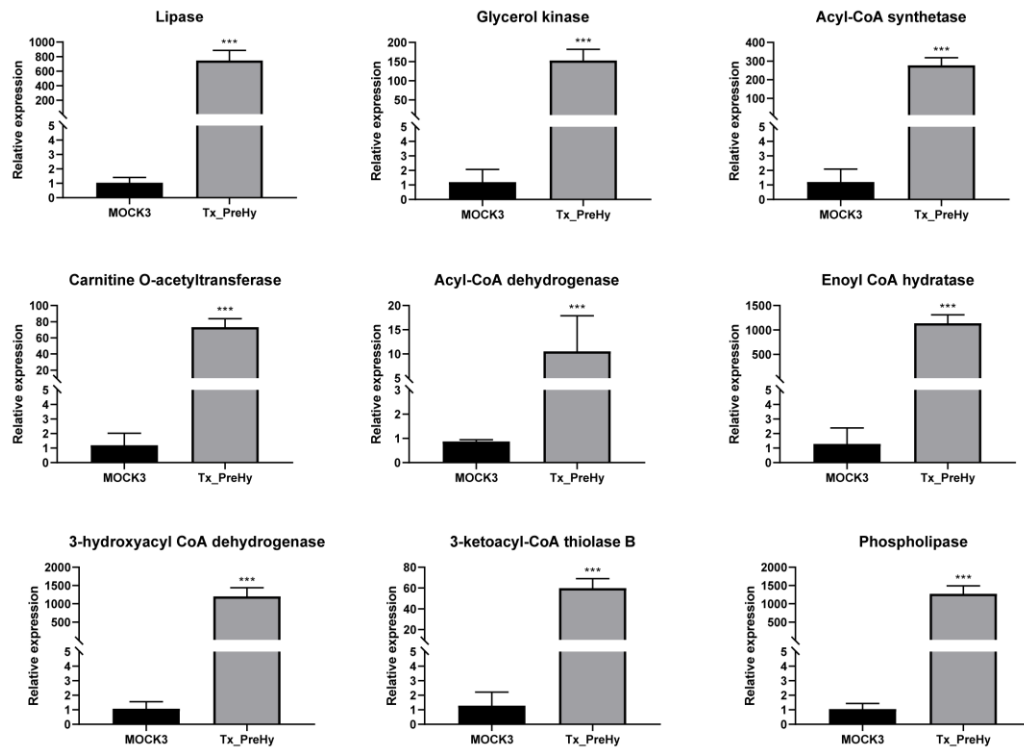

**Figure S7:** qRT-PCR validation of the gene associated with degradation of glycerolipids and fatty acids. The ribosomal protein S3 (rpS3) used as a reference gene. The bars represent means  $\pm$  SEM from three independent measurements, while letters on the bars indicate significance levels based on  $p < 0.001$ . Tx-PreHy, *T. xiaojinensis* samples collected when *O. sinensis* entered PreHy stage; MOCK3, the control for Tx- PreHy.
